# Supplementary material for: Tributyrin and anise mixture supplementation improves growth performance, nutrient digestibility, jejunal villus height, and fecal microbiota in weaned pigs
Source: Front Vet Sci. 2023 Jan 27;10:1107149. doi: 10.3389/fvets.2023.1107149 (PMC9911537; doi:10.3389/fvets.2023.1107149)
Supplement: Supplementary file 1 [file Table_1.XLSX]

## Sheet: Sheet1
Supplementary Table 4. Species level relative bacterial frequency data for the three groups with p < 0.05
Species	Control	TRT1	TRT2	p-value	Statistical significance
Bacteria;p__Bacteroidota;c__Bacteroidia;o__Bacteroidales;f__Prevotellaceae;g__Prevotella;__unclassification	8.90277	1.96993	2.5569	0.00680566	**
Bacteria;p__Firmicutes;c__Clostridia;o__Lachnospirales;f__Lachnospiraceae;g__Agathobacter;__unclassification	5.69372	1.76788	1.44839	0.00680566	**
Bacteria;p__Bacteroidota;c__Bacteroidia;o__Bacteroidales;f__Prevotellaceae;g__Prevotella;s__Prevotellaceae_bacterium	5.51111	1.4119	1.45738	0.00900478	**
Bacteria;p__Firmicutes;c__Clostridia;o__Oscillospirales;f__Ruminococcaceae;g__Faecalibacterium;__unclassification	4.38757	2.23195	2.72254	0.0323869	*
Bacteria;p__Bacteroidota;c__Bacteroidia;o__Bacteroidales;f__Prevotellaceae;g__Prevotella;s__metagenome	4.02265	1.29292	1.61503	0.00900478	**
Bacteria;p__Firmicutes;c__Bacilli;o__Lactobacillales;f__Lactobacillaceae;g__Lactobacillus;s__Lactobacillus_reuteri	3.56409	3.42042	7.19478	0.0188734	*
Bacteria;p__Bacteroidota;c__Bacteroidia;o__Bacteroidales;f__Prevotellaceae;g__Prevotella;s__Prevotella_copri	3.12516	0.66202	1.62344	0.00305798	**
Bacteria;p__Firmicutes;c__Bacilli;o__Lactobacillales;f__Lactobacillaceae;g__Lactobacillus;s__Lactobacillus_johnsonii	3.03439	0.252273	2.32745	0.00603608	**
Bacteria;p__Bacteroidota;c__Bacteroidia;o__Bacteroidales;f__Prevotellaceae;g__Prevotella;s__uncultured_bacterium	2.93397	2.33342	1.217	0.0107807	*
Bacteria;p__Firmicutes;c__Negativicutes;o__Veillonellales-Selenomonadales;f__Selenomonadaceae;g__uncultured;s__uncultured_rumen	2.75934	3.7376	0.547655	0.00680566	**
Bacteria;p__Firmicutes;c__Clostridia;o__Clostridiales;f__Clostridiaceae;g__Clostridium_sensu_stricto_1;s__uncultured_bacterium	1.94078	12.6349	7.88801	0.0086517	**
Bacteria;p__Bacteroidota;c__Bacteroidia;o__Bacteroidales;f__Prevotellaceae;g__Prevotella;s__Prevotella_sp.	1.78379	1.58505	0.494274	0.0086517	**
Bacteria;p__Firmicutes;c__Clostridia;o__Clostridia_UCG-014;f__Clostridia_UCG-014;g__Clostridia_UCG-014;__unclassification	1.56185	0.263715	0.302729	0.0086517	**
Bacteria;p__Firmicutes;c__Clostridia;o__Lachnospirales;f__Lachnospiraceae;g__[Ruminococcus]_gauvreauii_group;__unclassification	1.38505	0.851078	1.07675	0.0391639	*
Bacteria;p__Firmicutes;c__Bacilli;o__Lactobacillales;f__Lactobacillaceae;g__Lactobacillus;s__Lactobacillus_mucosae	1.35889	0.229047	0.423961	0.00524752	**
Bacteria;p__Firmicutes;c__Clostridia;o__Lachnospirales;f__Lachnospiraceae;g__Coprococcus;__unclassification	1.309	1.16742	2.51271	0.00814786	**
Bacteria;p__Firmicutes;c__Clostridia;o__Lachnospirales;f__Lachnospiraceae;g__Fusicatenibacter;s__uncultured_organism	1.25879	0.524156	0.440798	0.00603608	**
Bacteria;p__Firmicutes;c__Negativicutes;o__Veillonellales-Selenomonadales;f__Veillonellaceae;g__Dialister;s__uncultured_bacterium	1.08862	0.0234058	0.391239	0.00184558	**
Bacteria;p__Bacteroidota;c__Bacteroidia;o__Bacteroidales;f__Muribaculaceae;g__Muribaculaceae;s__uncultured_Porphyromonadaceae	0.924052	4.32392	2.03693	0.00790705	**
Bacteria;p__Bacteroidota;c__Bacteroidia;o__Bacteroidales;f__Prevotellaceae;g__Prevotellaceae_NK3B31_group;s__uncultured_bacterium	0.88694	1.95327	1.99156	0.0357931	*
Bacteria;p__Bacteroidota;c__Bacteroidia;o__Bacteroidales;f__Prevotellaceae;g__Alloprevotella;s__uncultured_bacterium	0.885191	0.980602	0.0942712	0.0126791	*
Bacteria;p__Firmicutes;c__Clostridia;o__Peptostreptococcales-Tissierellales;f__Peptostreptococcaceae;g__Terrisporobacter;s__uncultured_bacterium	0.748334	1.63232	2.02531	0.0139818	*
Bacteria;p__Firmicutes;c__Clostridia;o__Lachnospirales;f__Lachnospiraceae;g__Dorea;s__uncultured_bacterium	0.700323	0.51546	0.199956	0.0320997	*
Bacteria;p__Bacteroidota;c__Bacteroidia;o__Bacteroidales;f__Prevotellaceae;g__uncultured;s__metagenome	0.630127	0.355123	0.0834757	0.00190899	**
Bacteria;p__Firmicutes;c__Bacilli;o__Lactobacillales;f__Lactobacillaceae;g__Lactobacillus;s__Lactobacillus_salivarius	0.613685	0	0	0.00129977	**
Bacteria;p__Firmicutes;c__Clostridia;o__Lachnospirales;f__Lachnospiraceae;g__Oribacterium;s__uncultured_bacterium	0.612616	1.39107	1.57063	0.0121552	*
Bacteria;p__Firmicutes;c__Bacilli;o__Erysipelotrichales;f__Erysipelotrichaceae;g__Catenisphaera;s__uncultured_rumen	0.540309	0.0964316	0.2091	0.0167392	*
Bacteria;p__Firmicutes;c__Clostridia;o__Oscillospirales;f__Ruminococcaceae;g__Ruminococcus;s__Ruminococcus_bicirculans	0.509928	0.0136724	0.128045	0.00489275	**
Bacteria;p__Firmicutes;c__Clostridia;o__Lachnospirales;f__Lachnospiraceae;g__Lachnospiraceae_NK4A136_group;__unclassification	0.500369	1.37568	2.70981	0.00305798	**
Bacteria;p__Firmicutes;c__Negativicutes;o__Acidaminococcales;f__Acidaminococcaceae;g__Acidaminococcus;s__Acidaminococcus_fermentans	0.493153	0.214699	0.159197	0.0495206	*
Bacteria;p__Bacteroidota;c__Bacteroidia;o__Bacteroidales;f__Prevotellaceae;g__uncultured;s__uncultured_bacterium	0.492869	0.203891	0.269981	0.00900478	**
Bacteria;p__Bacteroidota;c__Bacteroidia;o__Bacteroidales;f__Prevotellaceae;g__Prevotellaceae_UCG-003;s__uncultured_bacterium	0.483919	0.374296	0.181639	0.0437178	*
Bacteria;p__Firmicutes;c__Clostridia;o__Lachnospirales;f__Lachnospiraceae;g__[Eubacterium]_ruminantium_group;s__uncultured_bacterium	0.481604	0.119153	0	0.0029283	**
Bacteria;p__Actinobacteriota;c__Coriobacteriia;o__Coriobacteriales;f__Atopobiaceae;g__Olsenella;__unclassification	0.472501	0.12955	0.2366	0.0222749	*
Bacteria;p__Firmicutes;c__Clostridia;o__Lachnospirales;f__Lachnospiraceae;g__Blautia;s__Ruminococcus_sp.	0.455349	0.480279	0.106731	0.0179762	*
Bacteria;p__Firmicutes;c__Clostridia;o__Oscillospirales;f__Ruminococcaceae;g__Fournierella;s__uncultured_bacterium	0.38159	0.224604	0.204664	0.00814786	**
Bacteria;p__Bacteroidota;c__Bacteroidia;o__Bacteroidales;f__Prevotellaceae;g__Alloprevotella;s__uncultured_Bacteroidales	0.337232	0.0328891	0.121877	0.00190899	**
Bacteria;p__Firmicutes;c__Negativicutes;o__Veillonellales-Selenomonadales;f__Selenomonadaceae;g__Mitsuokella;s__uncultured_bacterium	0.334413	0.152983	0.0257787	0.00807853	**
Bacteria;p__Firmicutes;c__Bacilli;o__Lactobacillales;f__Lactobacillaceae;g__Lactobacillus;s__Lactobacillus_amylovorus	0.278019	2.72445	3.53075	0.0387742	*
Bacteria;p__Firmicutes;c__Clostridia;o__Oscillospirales;f__Oscillospiraceae;g__Oscillospira;s__uncultured_bacterium	0.240402	0.65234	0.313938	0.0167392	*
Bacteria;p__Firmicutes;c__Clostridia;o__Lachnospirales;f__Lachnospiraceae;g__Lachnospiraceae_NK3A20_group;s__uncultured_Lachnospiraceae	0.23988	0.0943641	0	0.00307639	**
Bacteria;p__Firmicutes;c__Clostridia;o__Oscillospirales;f__[Eubacterium]_coprostanoligenes_group;g__[Eubacterium]_coprostanoligenes_group;s__Eubacterium_coprostanoligenes	0.227381	0.0190304	0.112119	0.0103235	*
Bacteria;p__Firmicutes;c__Clostridia;o__Oscillospirales;f__[Eubacterium]_coprostanoligenes_group;g__[Eubacterium]_coprostanoligenes_group;__unclassification	0.210736	0.362928	0.806419	0.0298969	*
Bacteria;p__Firmicutes;c__Clostridia;o__Lachnospirales;f__Lachnospiraceae;g__[Bacteroides]_pectinophilus_group;s__uncultured_bacterium	0.199755	0	0	0.00714619	**
Bacteria;p__Firmicutes;c__Clostridia;o__Oscillospirales;f__Ruminococcaceae;g__Ruminococcus;__unclassification	0.190671	0.0640765	0.352442	0.0177961	*
Bacteria;p__Firmicutes;c__Clostridia;o__Lachnospirales;f__Lachnospiraceae;g__Marvinbryantia;__unclassification	0.171736	0.716138	0.722598	0.00752142	**
Bacteria;p__Firmicutes;c__Clostridia;o__Lachnospirales;f__Lachnospiraceae;g__Coprococcus;s__metagenome	0.170642	0.313258	0.532123	0.00396599	**
Bacteria;p__Firmicutes;c__Clostridia;o__Oscillospirales;f__Oscillospiraceae;g__UCG-002;__unclassification	0.1559	0.93921	0.761482	0.0120597	*
Bacteria;p__Firmicutes;c__Bacilli;o__Lactobacillales;f__Streptococcaceae;g__Streptococcus;s__Streptococcus_hyointestinalis	0.143637	0.0610622	0.0130225	0.0257668	*
Bacteria;p__Firmicutes;c__Clostridia;o__Oscillospirales;f__[Eubacterium]_coprostanoligenes_group;g__[Eubacterium]_coprostanoligenes_group;s__uncultured_bacterium	0.139269	0.134507	0.358674	0.0356569	*
Bacteria;p__Firmicutes;c__Clostridia;o__Oscillospirales;f__Oscillospiraceae;g__UCG-005;__unclassification	0.128893	0.564073	1.11604	0.00470903	**
Bacteria;p__Bacteroidota;c__Bacteroidia;o__Bacteroidales;f__Prevotellaceae;g__Prevotellaceae_NK3B31_group;__unclassification	0.113888	1.17714	0.738766	0.00656568	**
Bacteria;p__Firmicutes;c__Clostridia;o__Oscillospirales;f__Oscillospiraceae;g__Colidextribacter;__unclassification	0.0890429	0.186311	0.0687734	0.00989483	**
Bacteria;p__Actinobacteriota;c__Coriobacteriia;o__Coriobacteriales;f__Coriobacteriaceae;g__Collinsella;__unclassification	0.0885239	0.282537	0.434341	0.018185	*
Bacteria;p__Firmicutes;c__Negativicutes;o__Veillonellales-Selenomonadales;f__Selenomonadaceae;__unclassification;__unclassification	0.0606195	0.092133	0.442759	0.0292889	*
Bacteria;p__Proteobacteria;c__Gammaproteobacteria;o__Aeromonadales;f__Succinivibrionaceae;g__Succinivibrio;__unclassification	0.0599254	1.04029	0.378511	0.00447164	**
Bacteria;p__Firmicutes;c__Clostridia;o__Oscillospirales;f__Ruminococcaceae;g__Ruminococcus;s__Clostridiaceae_bacterium	0.0509974	0	0.0819886	0.0454485	*
Bacteria;p__Bacteroidota;c__Bacteroidia;o__Bacteroidales;f__Prevotellaceae;__unclassification;__unclassification	0.0502937	0.2147	0	0.00615078	**
Bacteria;p__Firmicutes;c__Bacilli;o__Erysipelotrichales;f__Erysipelotrichaceae;g__Erysipelotrichaceae_UCG-009;s__uncultured_rumen	0.0463566	0	0	0.00714619	**
Bacteria;p__Firmicutes;c__Clostridia;o__Oscillospirales;f__Oscillospiraceae;g__Oscillibacter;__unclassification	0.0432986	0.257148	0.153974	0.0253978	*
Bacteria;p__Firmicutes;c__Clostridia;o__Oscillospirales;f__Ruminococcaceae;g__Subdoligranulum;s__uncultured_bacterium	0.0410529	0.537166	0.0473747	0.00401528	**
Bacteria;p__Firmicutes;c__Clostridia;o__Oscillospirales;f__Oscillospiraceae;__unclassification;__unclassification	0.0406342	0.29216	0.657406	0.00184558	**
Bacteria;p__Firmicutes;c__Clostridia;o__Oscillospirales;f__Oscillospiraceae;g__NK4A214_group;__unclassification	0.0378329	0	0.178756	0.0151285	*
Bacteria;p__Firmicutes;c__Clostridia;o__Lachnospirales;f__Lachnospiraceae;g__[Eubacterium]_hallii_group;__unclassification	0.0313934	0.323585	0.637872	0.00821756	**
Bacteria;p__Firmicutes;c__Clostridia;o__Clostridiales;f__Clostridiaceae;g__Clostridium_sensu_stricto_1;__unclassification	0.0289785	2.1639	0.294467	0.00303654	**
Bacteria;p__Firmicutes;c__Negativicutes;o__Acidaminococcales;f__Acidaminococcaceae;g__Phascolarctobacterium;s__uncultured_bacterium	0.0265636	0.209826	0.0898431	0.0092543	**
Bacteria;p__Firmicutes;c__Bacilli;o__Lactobacillales;f__Lactobacillaceae;g__Lactobacillus;__unclassification	0.0236477	1.6785	0.217878	0.0106937	*
Bacteria;p__Firmicutes;c__Clostridia;o__Lachnospirales;f__Lachnospiraceae;g__Lachnospiraceae_NK3A20_group;s__uncultured_bacterium	0.0171821	0.176666	0.0615812	0.0181133	*
Bacteria;p__Firmicutes;c__Clostridia;o__Lachnospirales;f__Lachnospiraceae;g__Butyrivibrio;s__Butyrivibrio_crossotus	0.0166996	0.234144	0.0451187	0.00914894	**
Bacteria;p__Firmicutes;c__Clostridia;o__Clostridiales;f__Clostridiaceae;g__Clostridium_sensu_stricto_1;s__Clostridium_butyricum	0.0144893	0.264198	0.314064	0.0211149	*
Bacteria;p__Spirochaetota;c__Spirochaetia;o__Spirochaetales;f__Spirochaetaceae;g__Treponema;s__Treponema_succinifaciens	0.00607257	0.0546526	0.202072	0.00702314	**
Bacteria;p__Firmicutes;c__Clostridia;o__Oscillospirales;f__Oscillospiraceae;g__NK4A214_group;s__metagenome	0.00603719	0.175252	0.100329	0.0481549	*
Bacteria;p__Actinobacteriota;c__Actinobacteria;o__Corynebacteriales;f__Corynebacteriaceae;g__Corynebacterium;__unclassification	0	0	0.187817	0.00714619	**
Bacteria;p__Actinobacteriota;c__Coriobacteriia;o__Coriobacteriales;f__Atopobiaceae;g__Olsenella;s__uncultured_bacterium	0	0.260395	0.145869	0.0165065	*
Bacteria;p__Bacteroidota;c__Bacteroidia;o__Bacteroidales;f__Prevotellaceae;g__Alloprevotella;__unclassification	0	0.651826	0	0.00129977	**
Bacteria;p__Bacteroidota;c__Bacteroidia;o__Bacteroidales;f__Rikenellaceae;g__dgA-11_gut_group;s__uncultured_Bacteroidales	0	0	0.0123613	0.0317804	*
Bacteria;p__Bacteroidota;c__Bacteroidia;o__Bacteroidales;f__Tannerellaceae;g__Parabacteroides;s__uncultured_bacterium	0	0.168987	0.0112797	0.0157584	*
Bacteria;p__Cyanobacteria;c__Vampirivibrionia;o__Gastranaerophilales;f__Gastranaerophilales;g__Gastranaerophilales;__unclassification	0	0	0.227858	0.00714619	**
Bacteria;p__Cyanobacteria;c__Vampirivibrionia;o__Gastranaerophilales;f__Gastranaerophilales;g__Gastranaerophilales;s__uncultured_bacterium	0	0.0642211	0.159978	0.023913	*
Bacteria;p__Firmicutes;c__Bacilli;o__Bacillales;f__Planococcaceae;g__Kurthia;__unclassification	0	0	0.39367	0.00129977	**
Bacteria;p__Firmicutes;c__Bacilli;o__Lactobacillales;f__Lactobacillaceae;g__Lactobacillus;s__Lactobacillus_pontis	0	0.99432	0.142386	0.0219149	*
Bacteria;p__Firmicutes;c__Clostridia;o__Clostridia_vadinBB60_group;f__Clostridia_vadinBB60_group;g__Clostridia_vadinBB60_group;s__gut_metagenome	0	0.0368702	0.211442	0.0272435	*
Bacteria;p__Firmicutes;c__Clostridia;o__Lachnospirales;f__Lachnospiraceae;g__Anaerostipes;s__uncultured_bacterium	0	0	0.105253	0.00714619	**
Bacteria;p__Firmicutes;c__Clostridia;o__Lachnospirales;f__Lachnospiraceae;g__Lachnospiraceae_NK4A136_group;s__gut_metagenome	0	0.198405	0.939648	0.00615078	**
Bacteria;p__Firmicutes;c__Clostridia;o__Lachnospirales;f__Lachnospiraceae;g__Roseburia;__unclassification	0	0.130582	0.350774	0.0370175	*
Bacteria;p__Firmicutes;c__Clostridia;o__Lachnospirales;f__Lachnospiraceae;g__Roseburia;s__Roseburia_sp.	0	0.231056	0	0.0317804	*
Bacteria;p__Firmicutes;c__Clostridia;o__Lachnospirales;f__Lachnospiraceae;g__[Eubacterium]_eligens_group;__unclassification	0	0.27565	0	0.00714619	**
Bacteria;p__Firmicutes;c__Clostridia;o__Lachnospirales;f__Lachnospiraceae;g__[Eubacterium]_ventriosum_group;s__uncultured_Eubacterium	0	0	0.156593	0.0317804	*
Bacteria;p__Firmicutes;c__Clostridia;o__Oscillospirales;f__Butyricicoccaceae;g__Butyricicoccus;__unclassification	0	0.0425121	0.120125	0.0175194	*
Bacteria;p__Firmicutes;c__Clostridia;o__Oscillospirales;f__Oscillospiraceae;g__NK4A214_group;s__uncultured_bacterium	0	0	0.081471	0.0317804	*
Bacteria;p__Firmicutes;c__Clostridia;o__Oscillospirales;f__Oscillospiraceae;g__uncultured;__unclassification	0	0	0.0558675	0.0317804	*
Bacteria;p__Firmicutes;c__Clostridia;o__Oscillospirales;f__Ruminococcaceae;g__Candidatus_Soleaferrea;s__uncultured_bacterium	0	0.108716	0.141609	0.0298637	*
Bacteria;p__Firmicutes;c__Clostridia;o__Oscillospirales;f__Ruminococcaceae;g__Ruminococcus;s__gut_metagenome	0	0.282016	0.305224	0.0149956	*
Bacteria;p__Firmicutes;c__Clostridia;o__Oscillospirales;f__Ruminococcaceae;g__Ruminococcus;s__uncultured_Clostridiaceae	0	0.39032	0.0138711	0.0023686	**
Bacteria;p__Firmicutes;c__Clostridia;o__Oscillospirales;f__Ruminococcaceae;g__uncultured;s__gut_metagenome	0	0.0169975	0.226719	0.0157584	*
Bacteria;p__Firmicutes;c__Clostridia;o__Oscillospirales;f__UCG-010;g__UCG-010;__unclassification	0	0.0535383	0.282089	0.0330801	*
Bacteria;p__Firmicutes;c__Clostridia;o__Oscillospirales;f__UCG-010;g__UCG-010;s__uncultured_bacterium	0	0.0271546	0.517398	0.0175194	*
Bacteria;p__Firmicutes;c__Clostridia;o__Oscillospirales;f__[Eubacterium]_coprostanoligenes_group;g__[Eubacterium]_coprostanoligenes_group;s__unidentified	0	0.113564	0	0.00714619	**
Bacteria;p__Firmicutes;c__Clostridia;o__Peptostreptococcales-Tissierellales;f__Anaerovoracaceae;g__Family_XIII_AD3011_group;s__uncultured_bacterium	0	0	0.142301	0.0317804	*
Bacteria;p__Firmicutes;c__Clostridia;o__Peptostreptococcales-Tissierellales;f__Anaerovoracaceae;g__[Eubacterium]_nodatum_group;s__uncultured_bacterium	0	0.0517282	0.516624	0.0036511	**
Bacteria;p__Firmicutes;c__Clostridia;o__Peptostreptococcales-Tissierellales;f__Peptostreptococcaceae;g__Romboutsia;__unclassification	0	0.467233	0.111987	0.00507887	**
Bacteria;p__Firmicutes;c__Negativicutes;o__Acidaminococcales;f__Acidaminococcaceae;g__Phascolarctobacterium;s__wallaby_gut	0	0.0247055	0	0.0317804	*
Bacteria;p__Proteobacteria;c__Gammaproteobacteria;o__Cardiobacteriales;f__Wohlfahrtiimonadaceae;g__Koukoulia;s__Koukoulia_aurantiaca	0	0	0.103551	0.00129977	**
Bacteria;p__Proteobacteria;c__Gammaproteobacteria;o__Pseudomonadales;f__Moraxellaceae;g__Acinetobacter;__unclassification	0	0	0.587361	0.00129977	**
Bacteria;p__Spirochaetota;c__Spirochaetia;o__Spirochaetales;f__Spirochaetaceae;g__Treponema;s__Treponema_berlinense	0	0.0273506	0.00680337	0.0286985	*
Bacteria;p__Spirochaetota;c__Spirochaetia;o__Spirochaetales;f__Spirochaetaceae;g__Treponema;s__uncultured_bacterium	0	0.141071	0.0799212	0.0465479	*
